# Supplementary material for: Targeting glucocorticoid receptors prevents the effects of early life stress on amyloid pathology and cognitive performance in APP/PS1 mice
Source: PubMed Central journal article supplement (PMC5830444; doi:10.1038/s41398-018-0101-2), 2018-03-01
Supplement: 41398_2018_101_MOESM1_ESM.pdf [file 41398_2018_101_MOESM1_ESM.pdf]

Supplementary table 1. Effects of chronic ELS exposure on pups (PND 9), 6 and 12 month old mice.

|                            |                                | Ctrl               |                                | ELS                              |                                 |
|----------------------------|--------------------------------|--------------------|--------------------------------|----------------------------------|---------------------------------|
|                            |                                | Light phase        | Dark phase                     | Light phase                      | Dark phase                      |
| Maternal care<br>(PND 2–9) | Duration nursing (s)           | 2667 ± 46 (8)      | 484 ± 45 (8)                   | 2323 ± 50 (10)*                  | 458 ± 52 (8)                    |
|                            | Duration off pups (s)          | 182 ± 40 (8)       | 561 ± 43 (8)                   | 454 ± 54 (10)*                   | 469 ± 54 (8)                    |
|                            | Number of exits                | 0.5 ± 0.2 (8)      | 2.4 ± 0.4 (8)                  | 2.4 ± 0.4 (10)*                  | 4.7 ± 0.9 (8)*                  |
|                            | # pup(s) out of nest           | 0.0 ± 0.0 (8)      | 0.0 ± 0.0 (8)                  | 4.8 ± 1.3 (10)*                  | 3.4 ± 0.8 (8)*                  |
|                            |                                | Ctrl               |                                | ELS                              |                                 |
| Pups                       | Body weight gain PND 2-9 (g)   | 3.47 ± 0.11 (24)   |                                | 2.60 ± 0.09 (27)*                |                                 |
|                            | Body weight PND 21 (g)         | 8.80 ± 0.23 (24)   |                                | 8.42 ± 0.23 (27)                 |                                 |
|                            |                                | Ctrl - WT          | Ctrl – APP/PS1                 | ELS – WT                         | ELS – APP/PS1                   |
| 6 months                   | Body weight (g)                | 29.4 ± 0.89 (12)   | 29.7 ± 0.34 (10)               | 28.9 ± 0.55 (11)                 | 29.7 ± 0.38 (14)                |
|                            | Thymus weight (% of BW)        | 0.159 ± 0.007 (8)  | 0.154 ± 0.003 (6)              | 0.147 ± 0.007 (10)               | 0.148 ± 0.004 (6)               |
|                            | Adrenal gland weight (% of BW) | 0.0062 ± 0.001 (8) | 0.0076 ± 0.001 (7)             | 0.0096 ± 0.001 (11) <sup>a</sup> | 0.0085 ± 0.001 (7) <sup>a</sup> |
| 12 months                  | Body weight (g)                | 39.43 ± 1.50 (13)  | 39.13 ± (9)                    | 38.65 ± 1.13 (17)                | 42.43 ± 1.75 (9)                |
|                            | Thymus weight (% of BW)        | 0.109 ± 0.005 (13) | 0.092 ± 0.004 (7) <sup>b</sup> | 0.090 ± 0.006 (16) <sup>b</sup>  | 0.107 ± 0.010 (9) <sup>b</sup>  |
|                            | Adrenal gland weight (% of BW) | 0.013 ± 0.001 (14) | 0.013 ± 0.001 (9)              | 0.011 ± 0.0008 (15) <sup>a</sup> | 0.011 ± 0.0007 (7) <sup>a</sup> |

Data expressed as mean ± S.E.M (n).

\* p<0.05, t-test compared to Ctrl mice

<sup>a</sup> p<0.05, two-way ANOVA, main effect for condition.

<sup>b</sup> p<0.05, two-way ANOVA, interaction effect.
